# Supplementary material
Source: Springer Nature journal article supplement (http://www.springermedizin.de/resource/supplementary/13046_2010_443_MOESM2_ESM.pdf/9662240)
Supplement: MOESM2 [file 9662240]

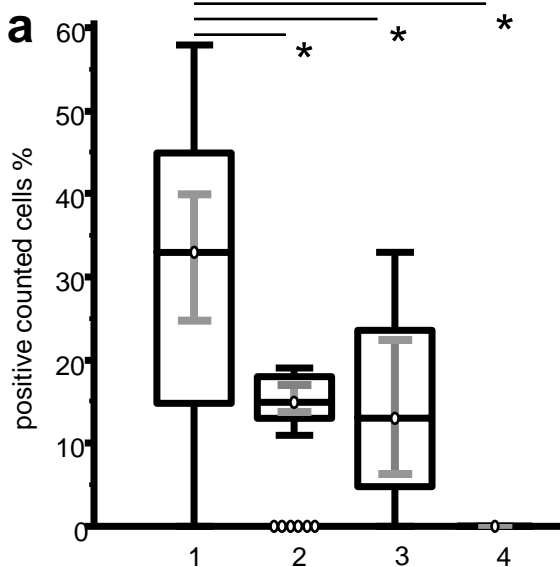

1 = Barrett's esophagus (BE) (n=41)  
 2 = Adjacent adenocarcinoma to BE (n=41)  
 3 = Adenocarcinoma without BE (n=19)  
 4 = Squamous-cell carcinomas (n=10)

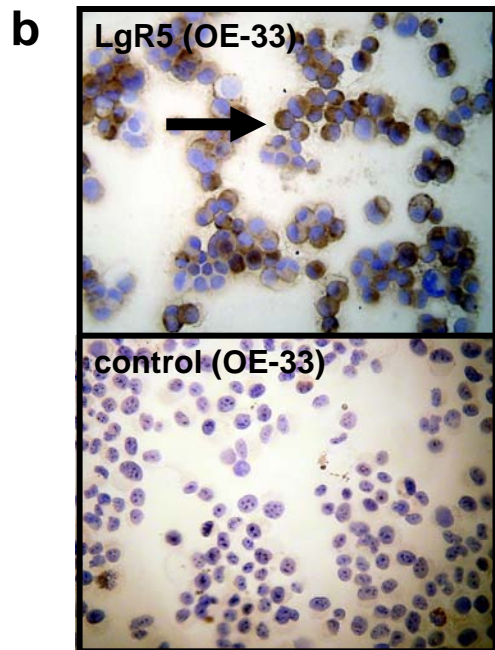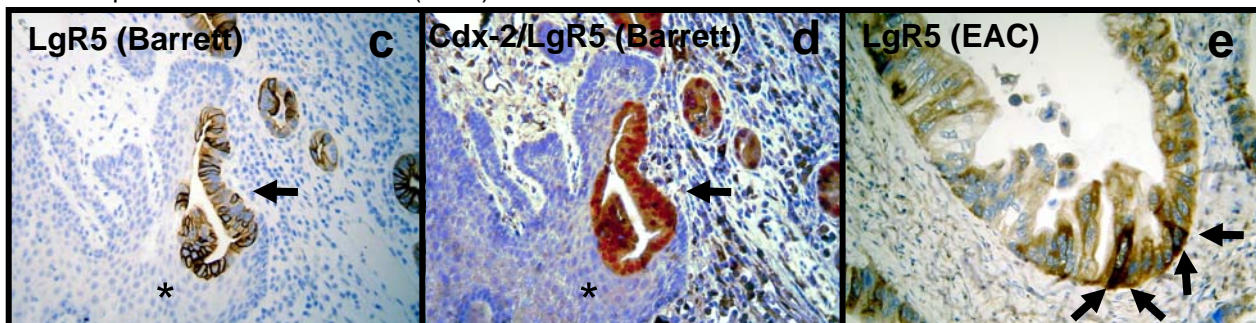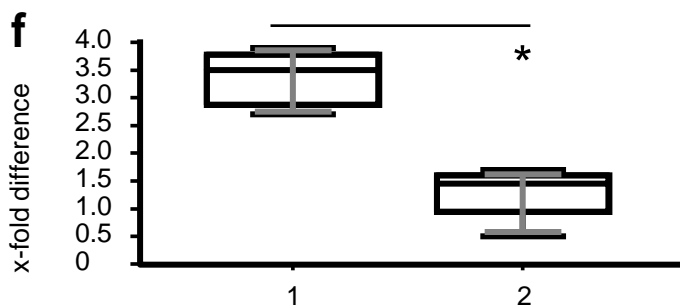

1 = Adenocarcinoma with Barrett's esophagus (BE) (n=7)  
 2 = Adenocarcinoma without BE (n=8)
